# Supplementary material for: EZH2-induced lysine K362 methylation enhances TMPRSS2-ERG oncogenic activity in prostate cancer
Source: PubMed Central journal article supplement (PMC8260656; doi:10.1038/s41467-021-24380-6), 2021-07-06
Supplement: 41467_2021_24380_MOESM1_ESM.pdf [file 41467_2021_24380_MOESM1_ESM.pdf]

# Supplementary information:

## Supplementary Figures

Zoma ,Curti et al. 2021

Corresponding author: Giuseppina M Carbone [pina.carbone@ior.usi.ch](mailto:pina.carbone@ior.usi.ch)

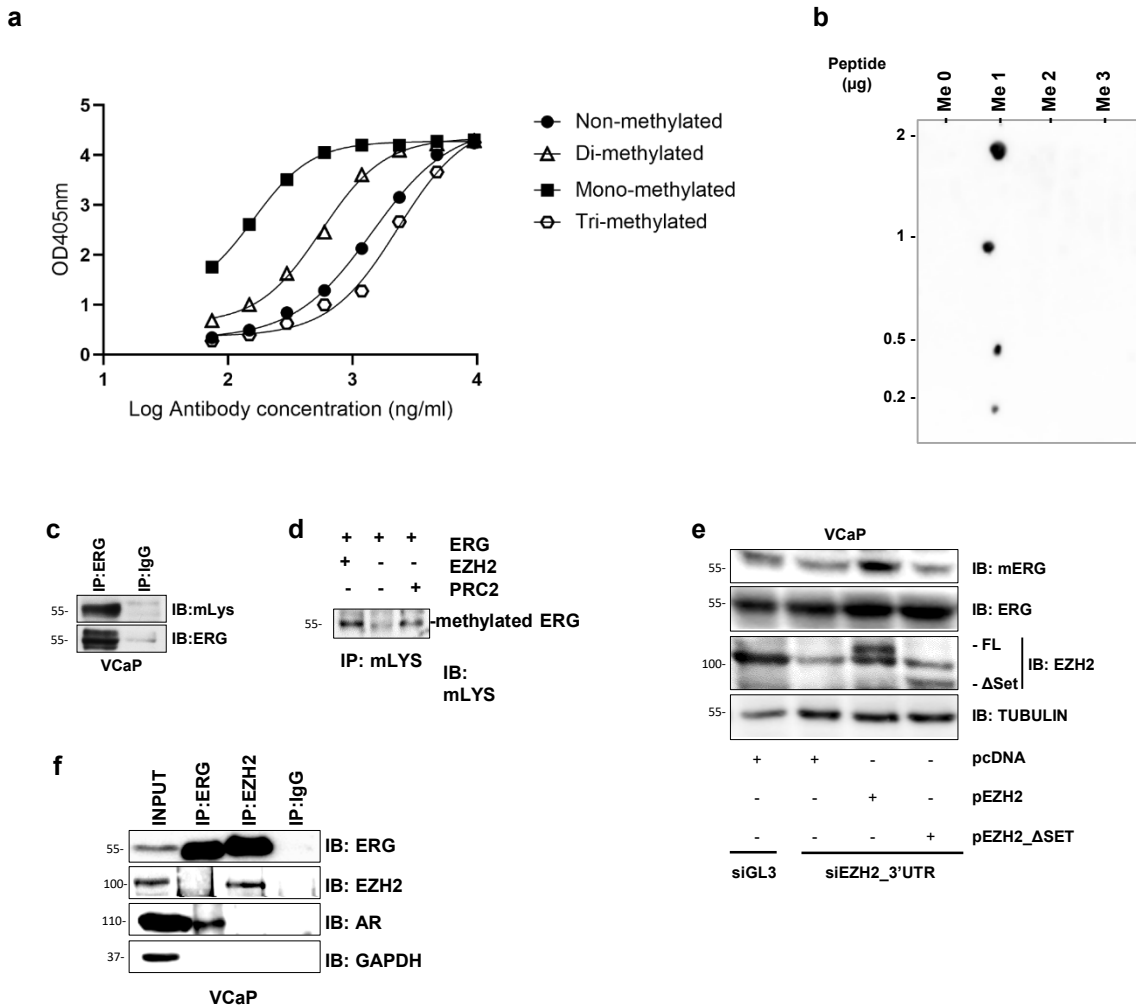

**Supplementary Figure 1. Detection of K362 methylated ERG and ERG/EZH2 interaction in human cells.** **a**, Binding of mERG antibody to ERG peptides (non-, mono- di- and tri- methylated), determined by enzyme-linked immunosorbent assay (ELISA). Plates were coated with biotinylated peptides and incubated with serially diluted mERG Ab. Absorbance was read at 405 nm. **b**, Detection of non-methylated and mono-, di- and tri- methylated ERG peptide with the anti-mERG antibody by immunoblotting. **c**, Immunoprecipitation (IP) with anti-ERG antibody followed by IB with anti-methyl-lysine (mLys) antibody (n=2). **d**, In vitro methylation assay with recombinant ERG incubated with EZH2 or PRC2 complex followed by IP with anti-methyllysine (mLys) antibody (n=2). **e**, mERG in EZH2 depleted (siEZH2-3'UTR) VCaP cells and reconstituted with WT or mutant EZH2 lacking the catalytic domain (pEZH2\_ΔSET) (n=2). **f**, ERG, AR and EZH2 interaction assessed by IP in VCaP cells (n=2). Molecular weights are indicated in kilodaltons (kDa). Source data are provided as a Source Data File.

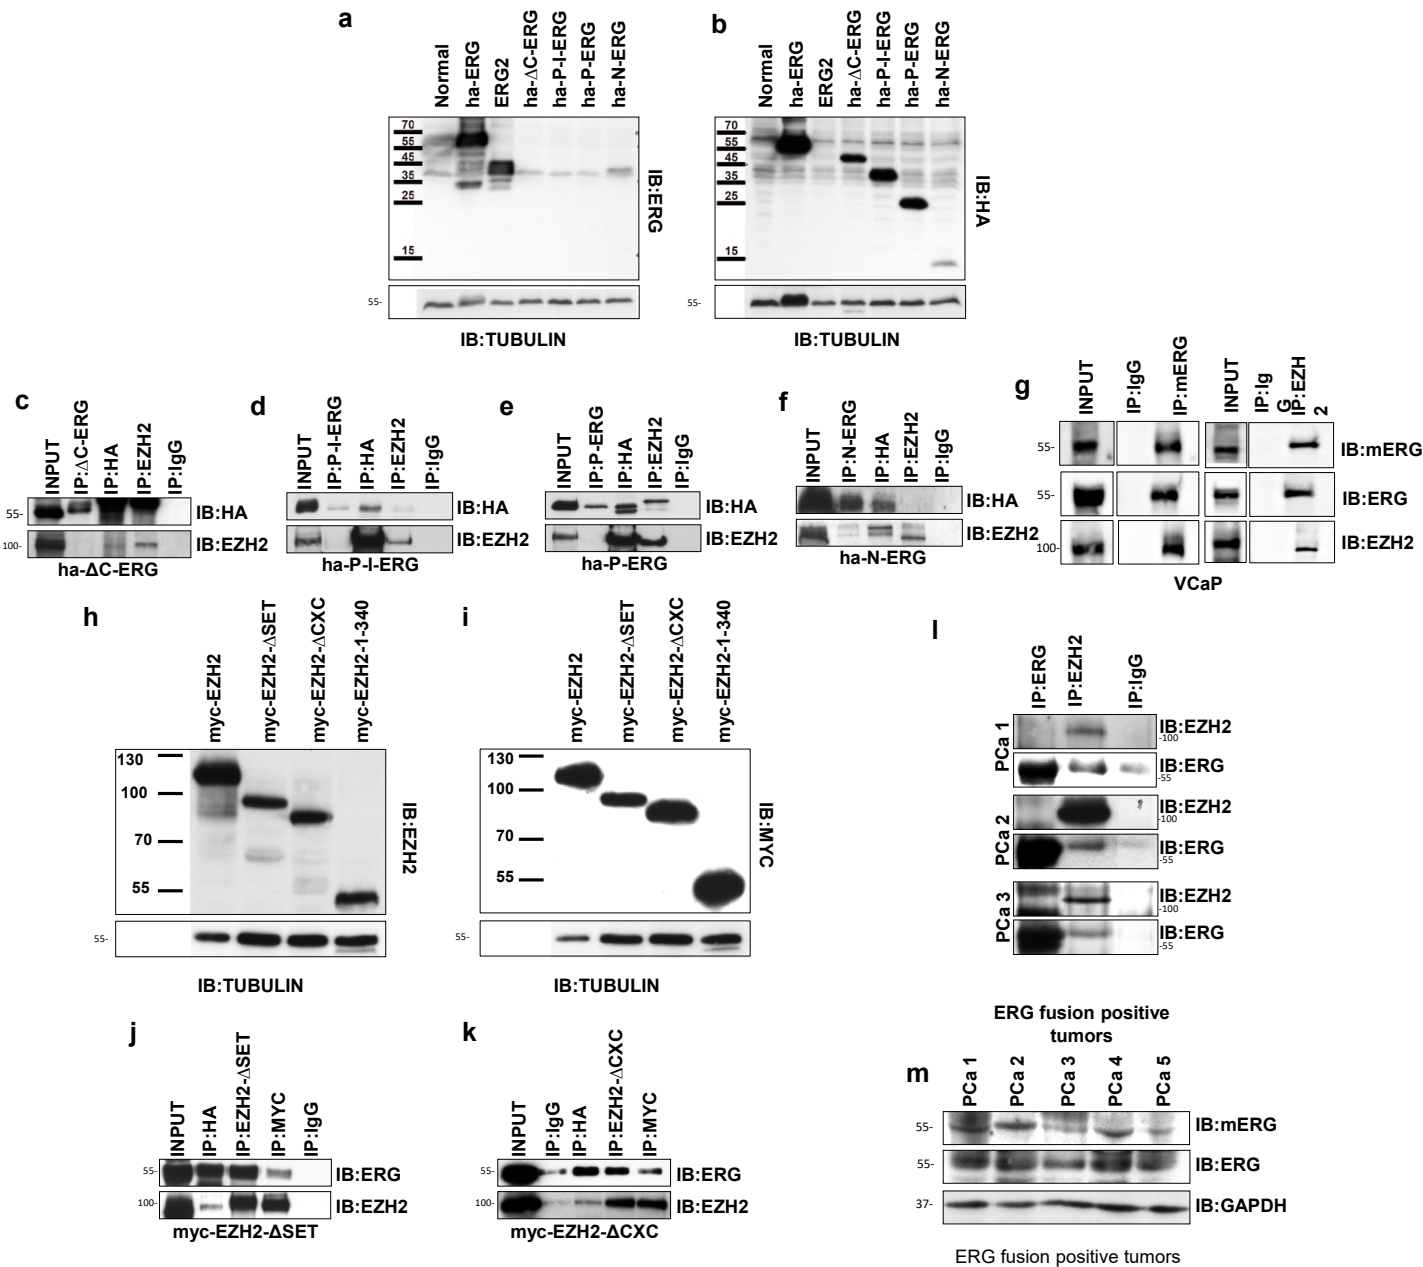

**Supplementary Figure 2. Identification of ERG and EZH2 interacting domains.** a-b, Immunodetection of the full length and truncated ERG constructs using anti-ERG (a) and anti-HA (b) antibodies (n=2). c-f, Binding of Ha-ΔC-ERG (c), Ha-P-I-ERG (d), Ha-P-ERG (e), Ha-N-ERG (f) to EZH2 assessed by co-immunoprecipitation in PC3 cells transiently transfected with the truncated ERG constructs (n=2). g, Immunoprecipitation of mERG and EZH2 in VCaP cells and immunoblots with the indicated Ab (n=2). h-i, Immunodetection of the full length and truncated EZH2 constructs using anti-EZH2 (h) and anti-Myc (i) antibodies (n=2). j-k, Binding of Myc-EZH2-ΔSET (j), Myc-EZH2-ΔCXC (k) to Ha-ERG assessed by co-immunoprecipitation in PC3 cells transiently transfected with the truncated EZH2 constructs along with ERG plasmid (n=2). l, ERG, mERG and EZH2 interaction in human ERG fusion positive prostate tumors determined by IP followed by IB with the indicated antibodies (n=2). Methyl ERG was detected with pan-methyl Lysine (mLys) Ab (n=2). m, Detection of mERG by immunoblotting in ERG fusion positive human prostate tumors (n=2). Molecular weights are indicated in kilodaltons (kDa). Source data are provided as a Source Data File.

a

| Contact Frequency |             |             |
|-------------------|-------------|-------------|
| AA                | me-K362     | K362        |
| S315              | ≤ 0.1       | 0.43        |
| G316              | 0.63        | 0.43        |
| Q317              | 0.49        | ≤ 0.1       |
| I318              | 0.65        | 0.41        |
| W358              | 0.93        | 0.99        |
| G359              | 0.41        | 0.92        |
| E360              | 0.19        | 0.48        |
| R361              | 1.00        | 1.00        |
| S363              | 1.00        | 1.00        |
| K364              | ≤ 0.1       | 0.94        |
| M367              | 0.28        | 0.68        |
| H409              | 0.11        | ≤ 0.1       |
| P410              | 0.16        | ≤ 0.1       |
| P411              | 0.19        | ≤ 0.1       |
| <b>E412</b>       | <b>0.22</b> | <b>0.72</b> |

b

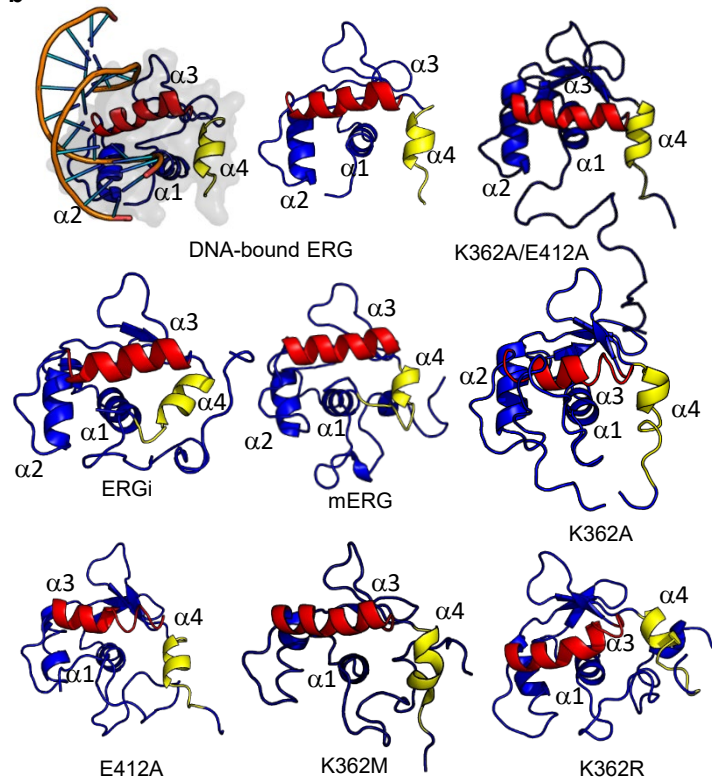

**Supplementary Figure 3. K362 methylation alters intramolecular contacts.** a, Intramolecular contact frequency of methylated and non-methylated K362 in the ERGi domain. Only contact frequencies > 0.1 are reported. b, Extracted structures of uninhibited (DNA-bound ERG), auto-inhibited (ERGi), methylated (mERG) and mutated ERG constructs (K362A, E412, K362M, K362R) by molecular dynamic simulation.

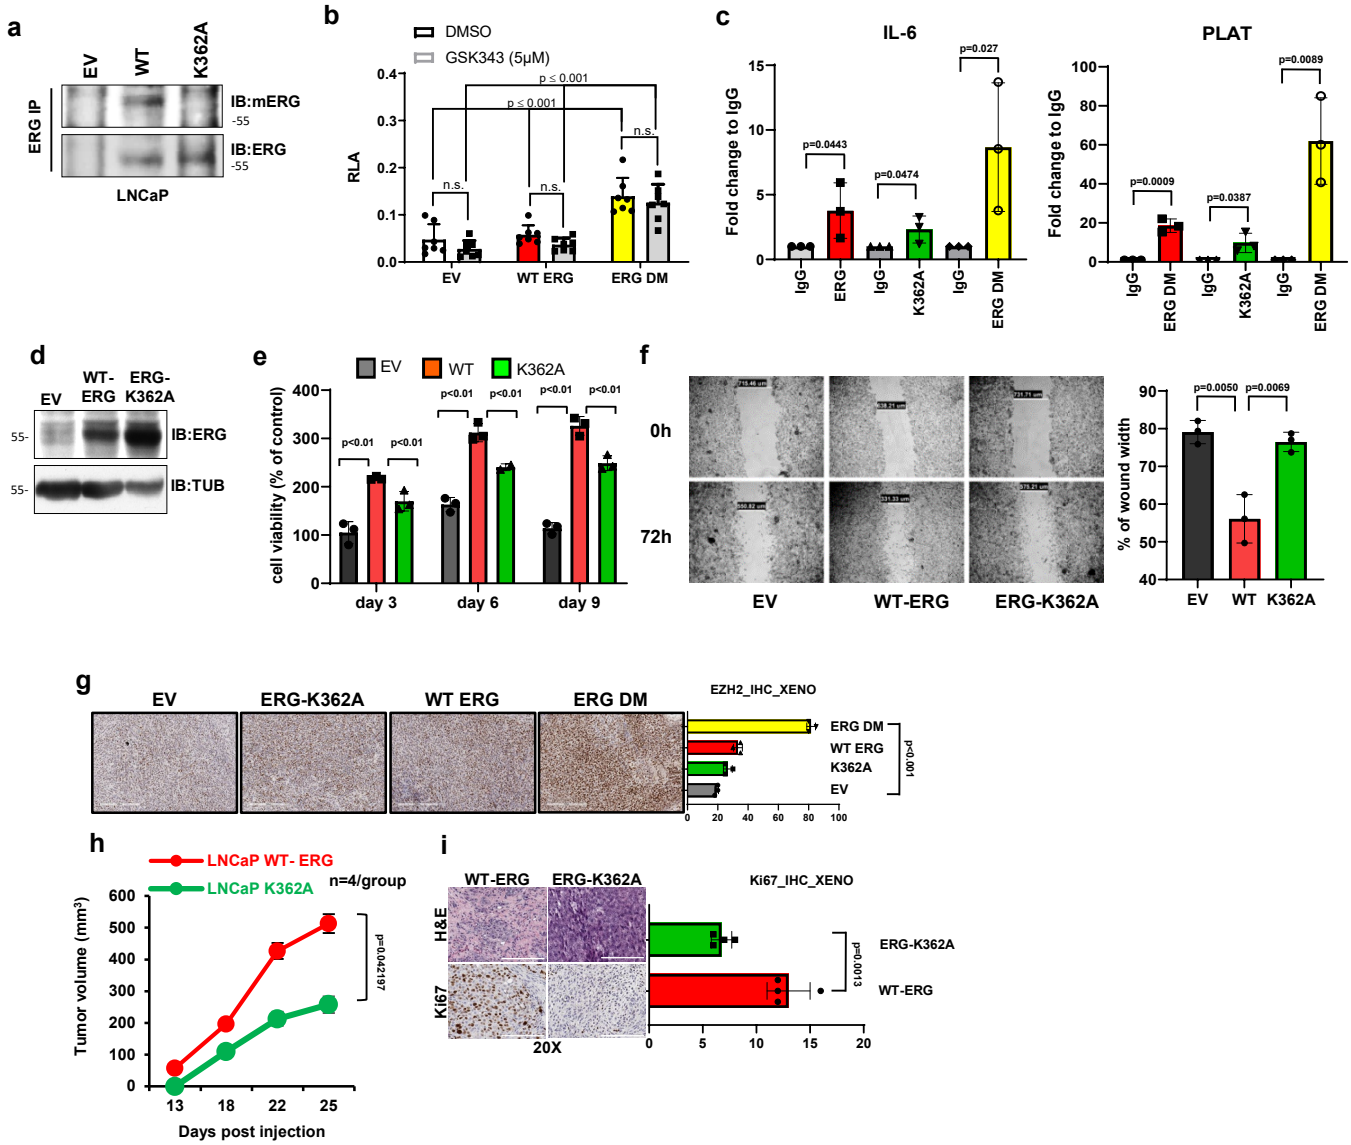

**Supplementary Figure 4. K362 methylation enhances ERG oncogenic activity.** **a**, Detection of ERG and mERG in LNCaP cells expressing WT or K362A ERG by IP followed by IB with indicated antibodies (n=2). **b**, Luciferase activity of the ETS responsive reporter in RWPE1 cells expressing WT, K362A, K362A/E412A ERG or empty vector (EV) incubated with DMSO or GSK343(5 $\mu$ M). not significant (n.s.). **c**, Binding of HA-tagged WT and mutants (K362A and ERG DM) ERG to IL-6 (left) and PLAT (right) promoter in RWPE1 cells by ChIP-qPCR with anti-HA antibody. **d**, Stable expression levels of WT and K362A ERG in LNCaP cells. EV, LNCaP expressing control empty vector (n=2). **e**, Survival in anoikis of LNCaP cells stably expressing WT, K362A ERG or an empty vector (EV). Cell viability at the indicated times is presented as percentage relative to day 0. **f**, Cell migration by wound healing assay in LNCaP cells stably expressing WT or ERG-K362A. Differences in wound width are shown as percentage relative to T0 (right). **g**, Histological and IHC scores of EZH2 in tumor xenografts from EV, WT-ERG or ERG-K362A and ERG DM RWPE1 stable cells. *Right*, IHC scores of EZH2 in indicated RWPE1 xenografts (n=4/group). **h**, Growth of xenografts of LNCaP cells stably expressing wild type ERG (WT-ERG) or mutant K362A (ERG-K362A) injected in NSG mice (n=4/group). **i**, Histological and IHC scores of Ki67 in tumor xenografts from WT-ERG or ERG-K362A LNCaP stable cells. Scale bars represent 200 $\mu$ m. *Right*, IHC scores of Ki67 in indicated LNCaP xenografts (n=4/group). All error bars, mean  $\pm$  s.d. (n=3, technical replicates). P-values were determined by one-way ANOVA test. Molecular weights are indicated in kilodaltons (kDa). Source data are provided as a Source Data File.

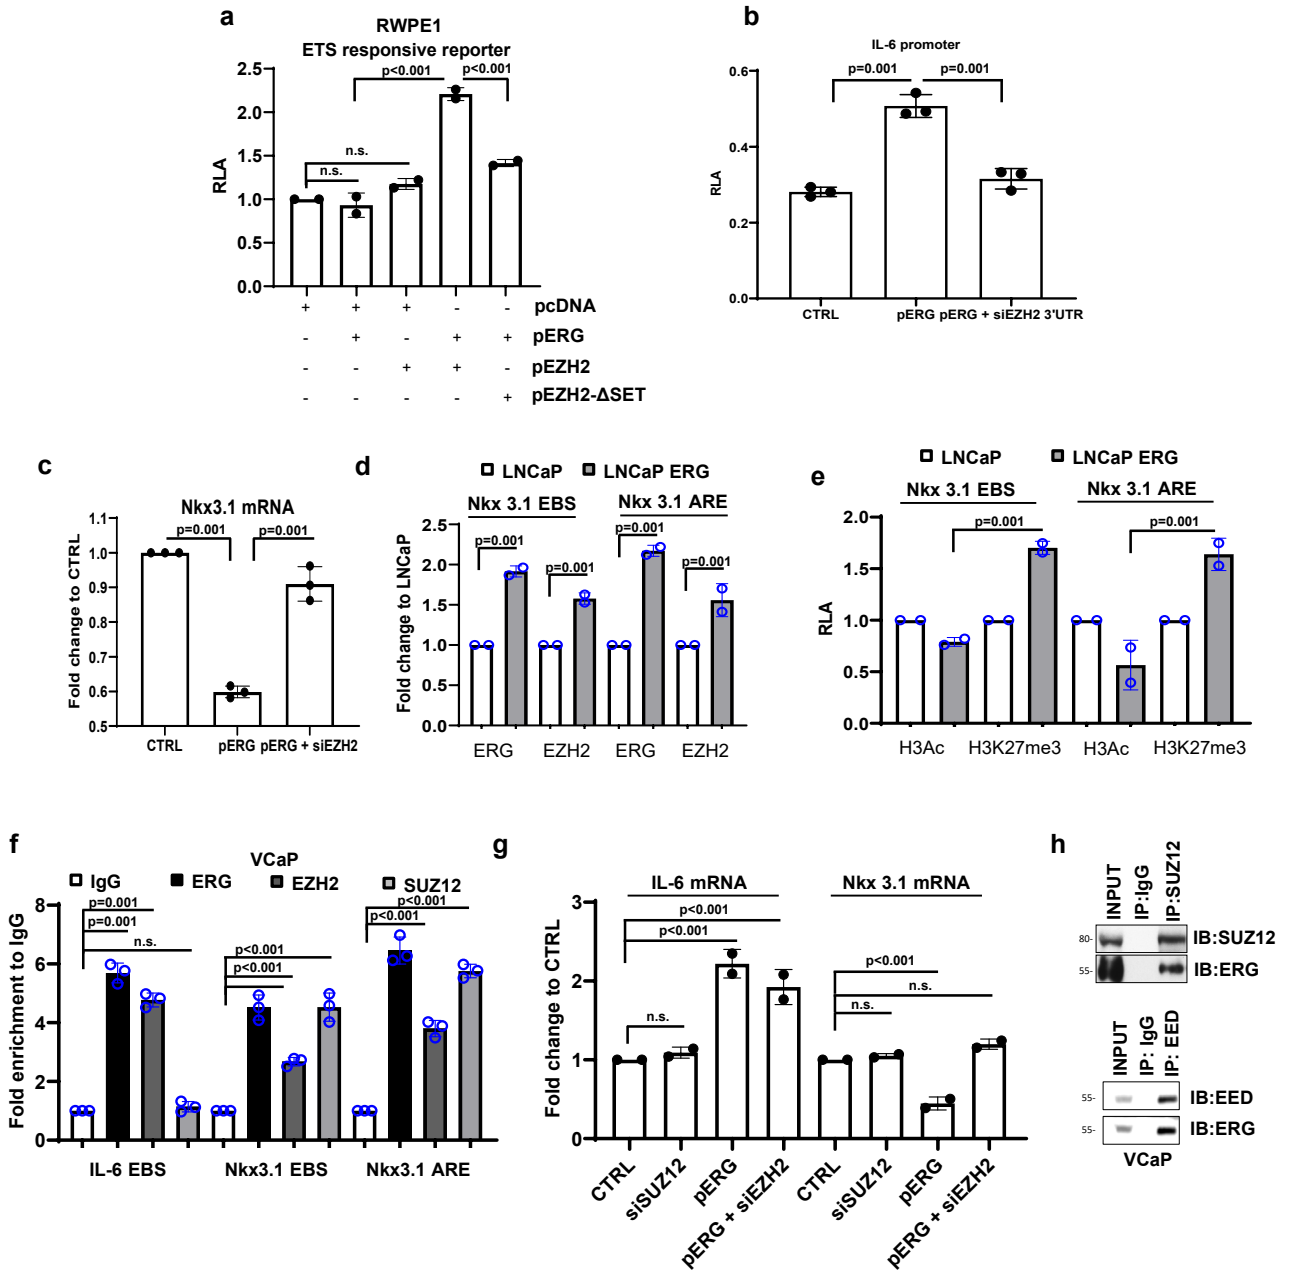

**Supplementary Figure 5. EZH2 enhances ERG transcriptional activity** **a**, ETS responsive reporter activity in RWPE1 (**left**) and LNCaP (**right**), transfected with the indicated vectors including WT-EZH2 and EZH2- $\Delta$ SET. **b**, IL-6 luciferase reporter assay after ERG over-expression and EZH2 knockdown. **c**, Nkx3.1 mRNA evaluated by qRT-PCR in LNCaP cells 48 h after ERG over-expression and EZH2 knockdown. **d**, ERG and EZH2 occupancy at Nkx3.1 locus in LNCaP and LNCaP-ERG cells evaluated by ChIP in the regions encompassing the ETS binding site (EBS) and androgen responsive element (ARE). **e**, H3Ac and H3K27me3 at Nkx3.1 promoter in LNCaP and LNCaP-ERG cells. **f**, ERG, EZH2 and SUZ12 occupancy at the IL-6 and Nkx3.1 promoters in VCaP cells. **g**, qRT-PCR analysis of IL-6 and Nkx3.1 mRNA in LNCaP cells 48 h after transfection with the indicated plasmids and siRNAs. n.s., not significant. **h**, Immunoprecipitation of SUZ12 (upper) and EED (lower) in VCaP cells and immunoblots with ERG Ab (n=2). All error bars, mean  $\pm$  s.d. (n=3, technical replicates). P-values were determined by one-way ANOVA test. Molecular weights are indicated in kilodaltons (kDa). Source data are provided as a Source Data File.



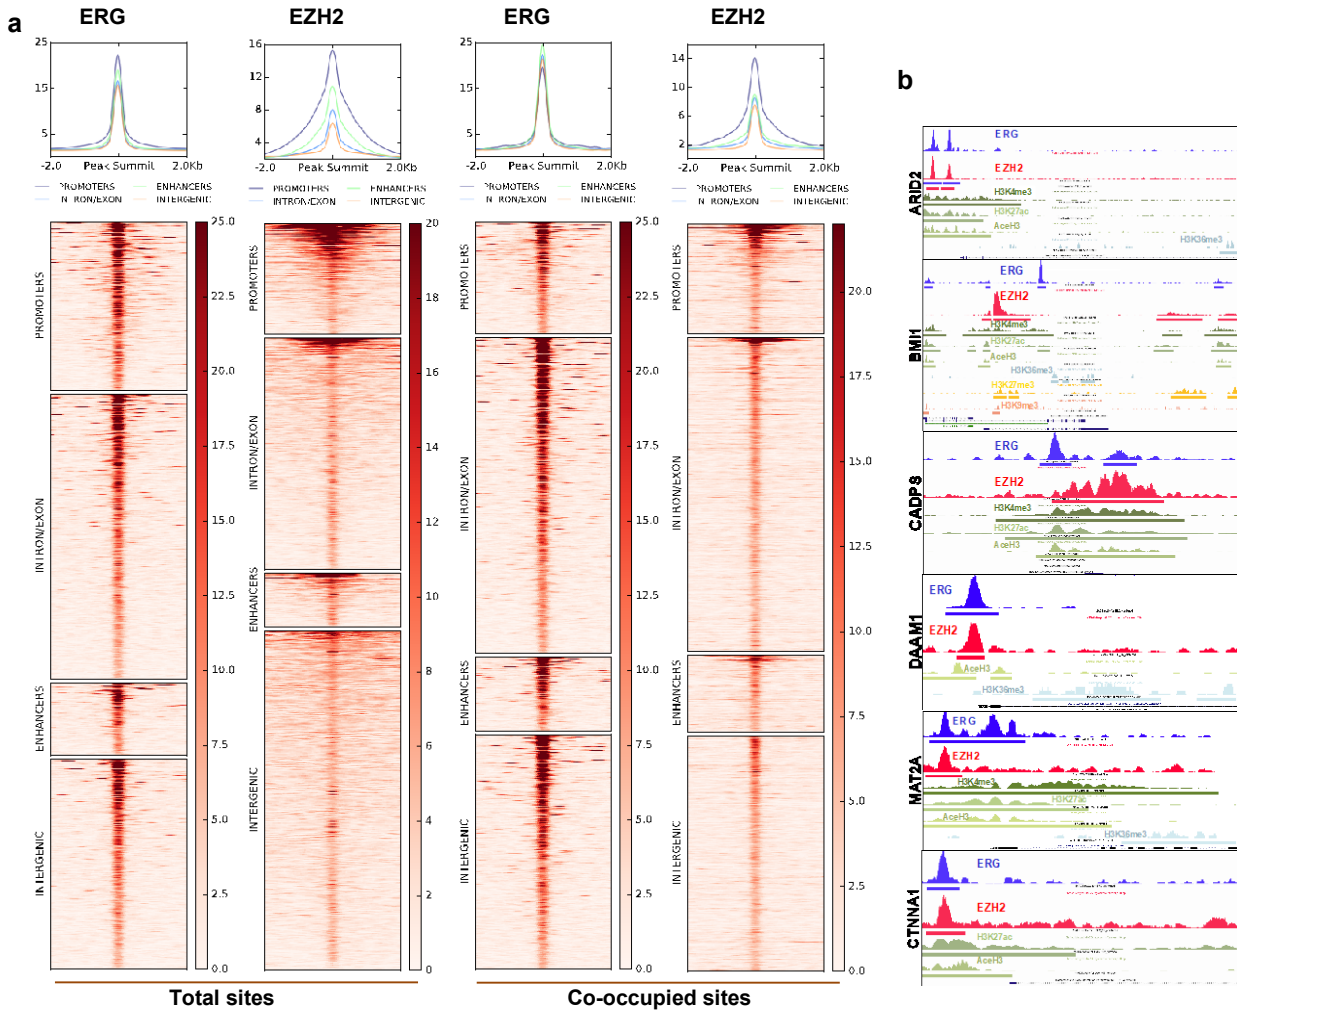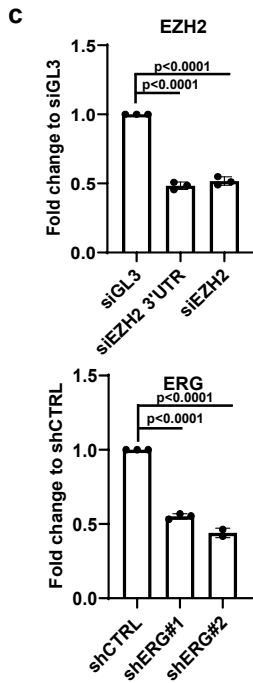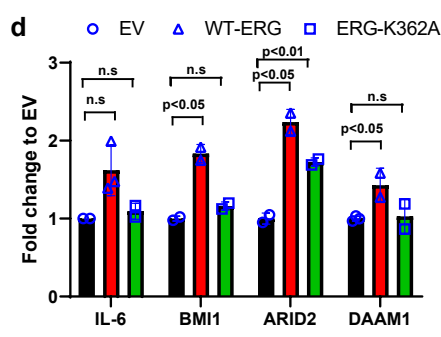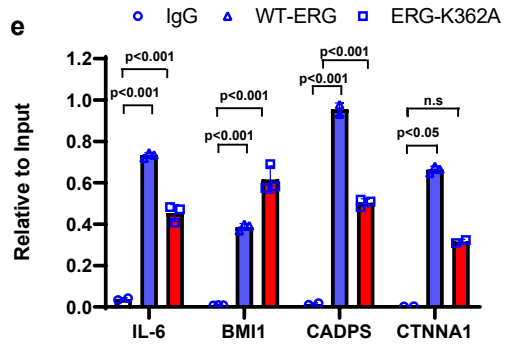

**Supplementary Figure 6. Genomic occupancy of ERG and EZH2 and distribution analysis of activating and repressive histone marks in co-occupied regions.** **a**, ChIP-Seq occupancy profiles and density plots of ERG and EZH2 binding events at total sites (left) and ERG/EZH2 co-occupied sites (right) for the indicated genomic regions. **b**, Representative ChIP-Seq occupancy profiles of ERG, EZH2 and indicated histone marks at the promoters of selected ERG/EZH2 co-occupied targets in VCaP cells. Genomic binding at these sites was validated by ChIP-reChIP shown in Figure 5H. **c**, Level of EZH2 and ERG in VCaP cells after knockdown with the indicated siRNAs or shRNAs. **d**, Expression of ERG/EZH2 co-occupied genes evaluated by qRT-PCR in LNCaP cells expressing EV, WT-ERG and ERG-K362A. **e**, ChIP analysis of ERG occupancy at the indicated ERG/EZH2 targeted promoters in LNCaP cells stably expressing WT-ERG or ERG-K362A. Data are presented as fold enrichment relative to input. All error bars, mean  $\pm$  s.d. (n=3, technical replicates). P-values were determined by one-way ANOVA test. Source data are provided as a Source Data File.

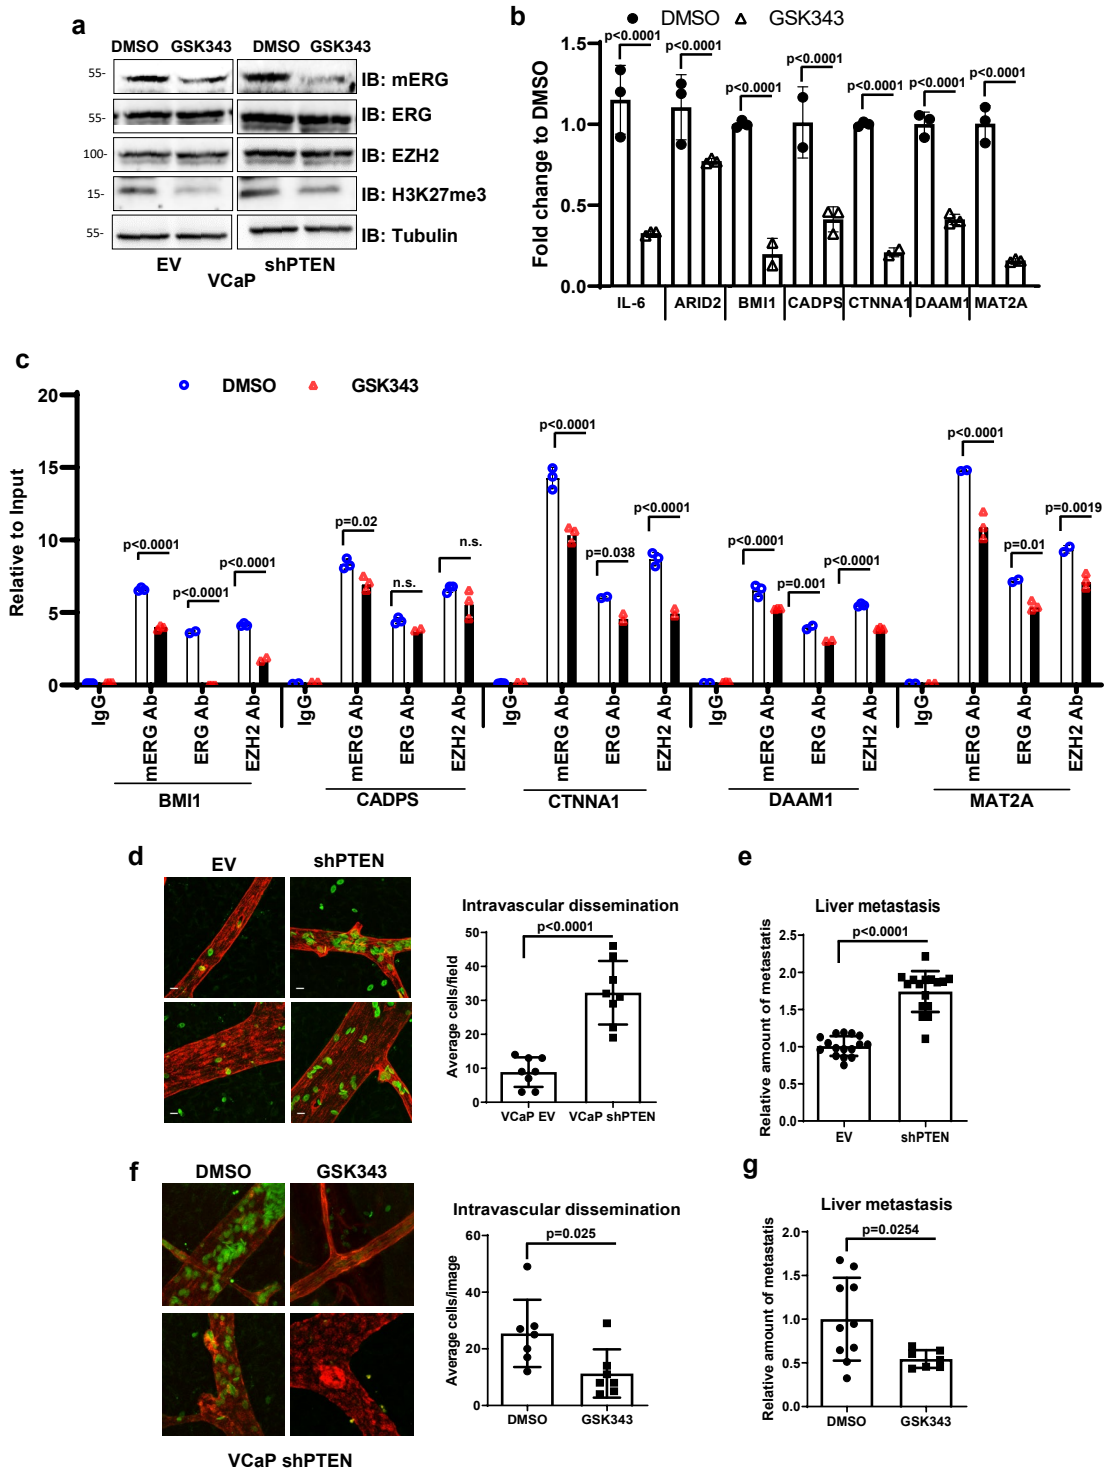

**Supplementary Figure 7. PTEN knockdown enhances ERG transcriptional and oncogenic activity and the EZH2 inhibitors GSK343 reverts these effect.** **a**, Immunoblots of mERG and the indicated proteins in control (EV) and stable PTEN knockdown (shPTEN) VCaP cells treated with GSK343 (5 $\mu$ M) or DMSO (n=2). **b**, Expression of indicated ERG/EZH2 targets in control (DMSO) and GSK343 treated VCaPshPTEN cells. **c**, ERG, mERG and EZH2 occupancy at the indicated promoters in VCaPshPTEN cells after treatment for 24 h with DMSO or GSK343 (5 $\mu$ M). **d**, Intravascular dissemination of VCaP-shPTEN and control (EV) VCaP cells in CAM assay. *Right*, quantification of average number of intravascular cells/field. *Left*, Representative images. Red, chicken endothelial cells; green, cancer cells. **e**, PCR-based quantification of metastatic VCaP-shPTEN and control (EV) VCaP cells in chicken embryo liver (n=8) in CAM assays. **f**, Intravascular dissemination of VCaP-shPTEN cells treated with DMSO or GSK343 (10 $\mu$ M) in CAM assay. *Left*, Representative images of intravascular dissemination formation by VCaP-shPTEN. *Right*, quantification of average number of intravascular cells/field. Red, chicken endothelial cells; green, cancer cells. **g**, PCR-based quantification of metastatic VCaP-shPTEN cells treated with DMSO or GSK343 (10 $\mu$ M) in chicken embryo liver (n=8) in CAM assays. Scale bar = 20 $\mu$ m. All error bars, mean  $\pm$  s.d. (n=3, technical replicates). P-values were determined by one-way ANOVA test. Molecular weights are indicated in kilodaltons (kDa). Source data are provided as a Source Data File.

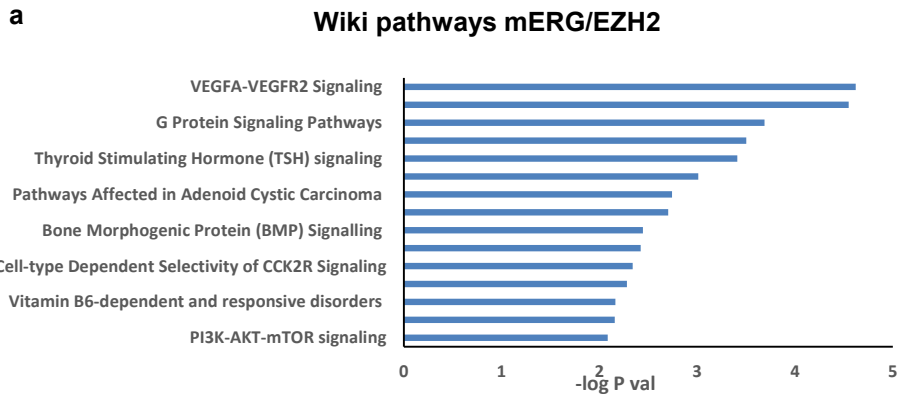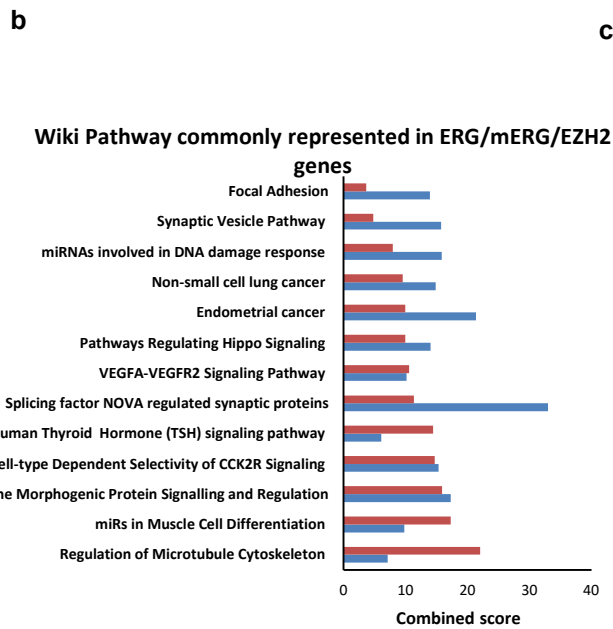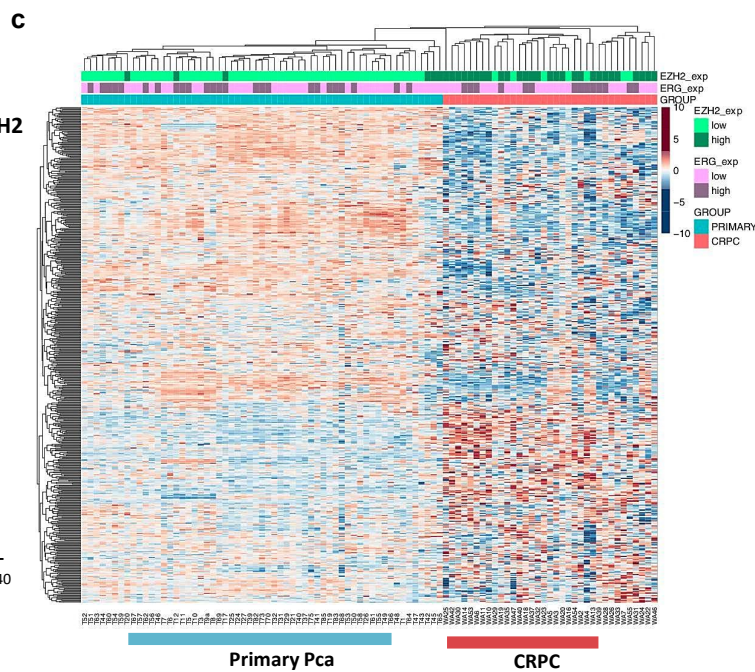

**Supplementary Figure 8. mERG/EZH2 co-regulated genes are expressed in aggressive prostate tumors.** **a**, Top pathways enriched in the list of genes co-occupied by mERG/EZH2 (GS\_mERG/EZH2, n=1656 genes) using *enrich* tool. **b**, Pathways commonly represented in ERG and mERG/EZH2 GS. **c**, Heat Map using the GS\_mERG/EZH2 set applied to primary prostate tumors (Primary) and castration-resistant prostate cancers (CRPC) with known ERG and EZH2 status in the Michigan dataset. Color bars indicate ERG and EZH2 expression status.

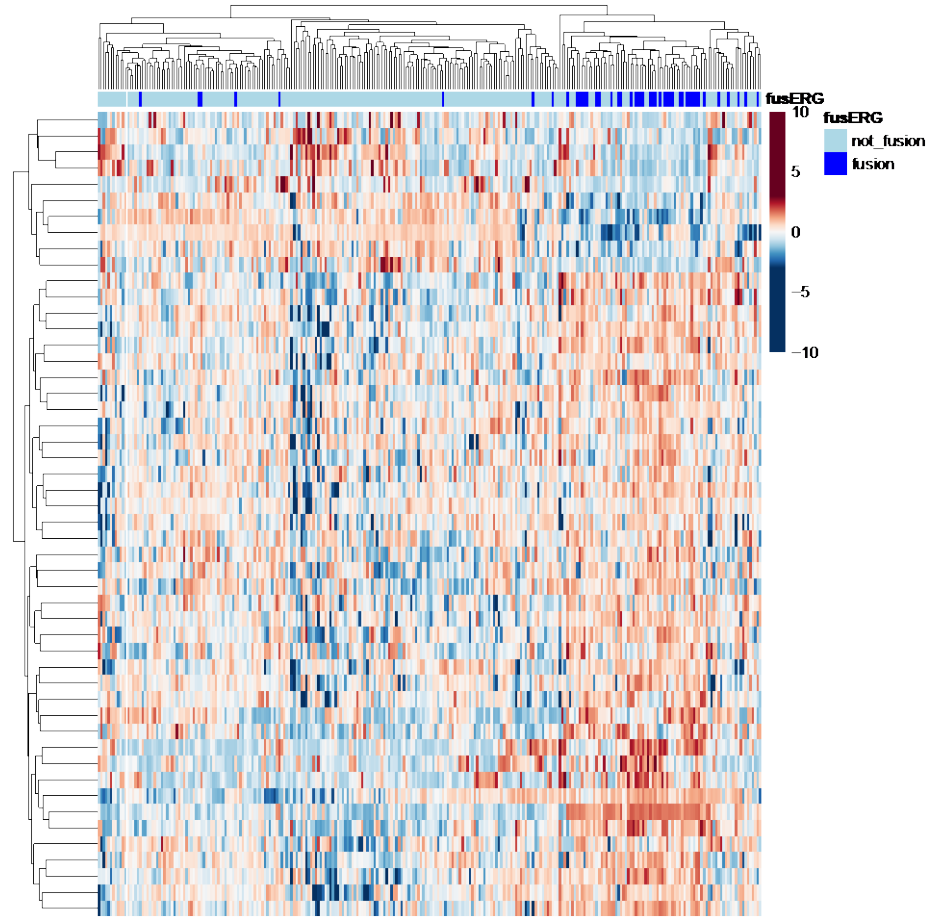

Sboner dataset \_HM (GS\_ERG/EZH2\_50)

**Supplementary Figure 9. ERG/EZH2 co-regulated genes are expressed in aggressive prostate tumors.**

HM with the top deregulated ERG/EZH2 gene set (GS\_ERG/EZH2\_50) in the Sboner dataset. Color bars indicate fusion ERG status.

Supplementary Table 1:  
siRNAs and shRNA information

|                                        |                                                                |
|----------------------------------------|----------------------------------------------------------------|
| siGL3                                  | 5' CUUACGCUGAGUACUUCGAtt 3'<br>5' UCGAAGUACUCAGCGUAAGtt 3'     |
| siRNA Negative Control<br>(NC) for DLA | Catalog n. 4611 (Ambion)                                       |
| siERG                                  | Catalog n. SI03089443 (Qiagen)                                 |
| siEZH2                                 | 5' CAAAGAAUCUAGCAUCAUAtt 3'<br>5' UAUGAUGCUAGAUUCUUUGtt 3'     |
| siEZH2 3UTR                            | 5' GCAAUUUAGAAAAAGAACAtt 3'<br>5' UGUUCUUUUUCUAAAUUGCcc 3'     |
| siSUZ12                                | 5' GGAUGUAAGUUGUCCAAUAtt 3'<br>5'UAUUGGACAACUACAUCtt 3'        |
| siPTEN                                 | 5' GCAUACGAUUUUAAAGCGGAtt 3'<br>5' UCCGCUUAAAAUCGUAUGCag 3'    |
| shPTEN                                 | Clone ID:NM_000314.4-2996s21c1 (Sigma)                         |
| siERG#1                                | Catalog n. 4392420 assay i.d. s4812 (Thermofisher Scientific)  |
| siERG#2                                | Catalog n. 4392420 assay i.d. s4813 (Thermofisher Scientific)  |
| shERG#1                                | cat number TRCN0000429354 Clone ID: NM_004449.4-331s21c1 SIGMA |
| shERG#2                                | cat number TRCN0000429394 Clone ID: NM_004449.4-1642s21c SIGMA |

**Supplementary Table 2: Primer sets used for RT-PCR, ChIP and mutagenesis.**

| Gene ID                    | Assay   | Forward (FWD) and reverse (REV) primer sequences |
|----------------------------|---------|--------------------------------------------------|
| human IL-6                 | qRT-PCR | FWD: CCACACAGACAGCCACTCAC                        |
| human IL-6                 | qRT-PCR | REV: TTTCAGCCATCTTTGGAAGG                        |
| human NKX 3.1              | qRT-PCR | FWD: AGAAAGGCACTTGGGGTCTT                        |
| human NKX 3.1              | qRT-PCR | REV: TCCTCTCCAACCTCGATCACC                       |
| human ARID2                | qRT-PCR | FWD: GAAGGAGCTGGATCTTCACG                        |
| human ARID2                | qRT-PCR | REV: AAGCAAAGGCAGCGTTAGAA                        |
| human BMI1                 | qRT-PCR | FWD: TTCTTTGACCAGAACAGATTGG                      |
| human BMI1                 | qRT-PCR | REV: GCATCACAGTCATTGCTGCT                        |
| human CADPS                | qRT-PCR | FWD: CCGAATGGATAAGCCTCAAA                        |
| human CADPS                | qRT-PCR | REV: ATAAGTGCACATGGCAAACG                        |
| human CTNNA1               | qRT-PCR | FWD: CATGTTTTGGCTGCATCTGT                        |
| human CTNNA1               | qRT-PCR | REV: CAGCAGCCTTCATCAAATCA                        |
| human DAAM1                | qRT-PCR | FWD: TGCACTTCCAGCTGAGAAAA                        |
| human DAAM1                | qRT-PCR | REV: TCAGTGCTGTCTTTAACTCTCT                      |
| human MAT2A                | qRT-PCR | FWD: AGGGATGCCCTAAAGGAGAA                        |
| human MAT2A                | qRT-PCR | REV: ATTTTGCGTCCAGTCAAACC                        |
| mouse Rn18s                | qRT-PCR | FWD: ACCGCAGCTAGGAATAATG                         |
| mouse Rn18s                | qRT-PCR | REV: GCCTCAGTTCCGAAAACCA                         |
| mouse IL-6                 | qRT-PCR | FWD: TCCTTCCTACCCCAATTTCC                        |
| mouse IL-6                 | qRT-PCR | REV: GCACTAGGTTTGCCGAGTAGAT                      |
| mouse ARID2                | qRT-PCR | FWD: TCATGCAGCTTGAGAAGGATCC                      |
| mouse ARID2                | qRT-PCR | REV: AGAAGAGTGGCGAGAGAAGACT                      |
| mouse BMI1                 | qRT-PCR | FWD: GAAATGGCCCACTACCTTTG                        |
| mouse BMI1                 | qRT-PCR | REV: CTTTCCAGCTCTCCAGCATT                        |
| mouse CADPS                | qRT-PCR | FWD: CTCAGAAGCATGGCATGGATGA                      |
| mouse CADPS                | qRT-PCR | REV: GGCTGACTTTGGATCACAGACT                      |
| mouse CTNNA1               | qRT-PCR | FWD: AGGCCGTACAGGAATTTCT                         |
| mouse CTNNA1               | qRT-PCR | REV: ATTGTGGACCCCTTGAGCTT                        |
| mouse DAAM1                | qRT-PCR | FWD: AACCCGCTTCCAGACGTTAA                        |
| mouse DAAM1                | qRT-PCR | REV: ATCAATGCAGTGCTGAGCCA                        |
| mouse MAT2A                | qRT-PCR | FWD: GAGGGTTCTTGTTTCAGGTCTC                      |
| mouse MAT2A                | qRT-PCR | REV: GAATTTTGATCTTCGCCCTGGG                      |
| mouse EZH2                 | qRT-PCR | FWD: CATCCCGTTAAAGACCCTGA                        |
| mouse EZH2                 | qRT-PCR | REV: CCAGAACTTCATCCCCATA                         |
| mouse Lin28A               | qRT-PCR | FWD: TAAGAAGTCTGCCAAGGGTCTG                      |
| mouse Lin28A               | qRT-PCR | REV: CCTTTGGATCTTCGCTTCTG                        |
| mouse POU5F1               | qRT-PCR | FWD: CAAGTTGGCGTGGAGACTTT                        |
| mouse POU5F1               | qRT-PCR | REV: TTGGTTCCACCTTCTCCAAC                        |
| mouse IL-6 promoter        | ChIP    | FWD: AGGAGTGTGAGGCAGAGAGC                        |
| mouse IL-6 promoter        | ChIP    | REV: AGTCTCCTGCGTGGAGAAAA                        |
| mouse ARID2 promoter       | ChIP    | FWD: AAGCACGCTCCGCTCTATTA                        |
| mouse ARID2 promoter       | ChIP    | REV: TAGTCTTTCCGATGGGAGCA                        |
| mouse BMI1 promoter        | ChIP    | FWD: CTCGGTGCCCATTTGACAG                         |
| mouse BMI1 promoter        | ChIP    | REV: AATGAATGCGAGCCAAGC                          |
| mouse MAT2A promoter       | ChIP    | FWD: CCCTTCTCGATTTCTGGAAC                        |
| mouse MAT2A promoter       | ChIP    | REV: CCTTTCTCCGCTCCTCATC                         |
| human IL-6 promoter EBS    | ChIP    | FWD: ACAGCTGGGAAGACGAGAAA                        |
| human IL-6 promoter EBS    | ChIP    | REV: GGAAGTTCGTGTTTCATGATAAAA                    |
| human NKX 3.1 promoter EBS | ChIP    | FWD: TGCGGATAAAGGAACCACCA                        |
| human NKX 3.1 promoter EBS | ChIP    | REV: AGGCATGACAAGTAGGTGCAGC                      |
| human NKX 3.1 promoter ARE | ChIP    | FWD: TCGCGGTGAGAAAATCAGTGT                       |



|                            |      |                                                  |
|----------------------------|------|--------------------------------------------------|
| human NKX 3.1 promoter ARE | ChIP | REV: TGAAAAGCATGCCCTGGTG                         |
| human ARID2 promoter       | ChIP | FWD: ACATCGCCTCCACCCCTA                          |
| human ARID2 promoter       | ChIP | REV: CGGGGAACAATAGACTCGAC                        |
| human BMI1 promoter        | ChIP | FWD: GGCTCGCATTTCATTTTCTGC                       |
| human BMI1 promoter        | ChIP | REV: GCCTCGCCTCCTACGTAC                          |
| human CADPS promoter       | ChIP | FWD: CTCCCAATCGGCAAGAT                           |
| human CADPS promoter       | ChIP | REV: GGCAAGGGGGAGAATCAAT                         |
| human CTNNA1 promoter      | ChIP | FWD: AGAATGACATGGGGAACAGC                        |
| human CTNNA1 promoter      | ChIP | REV: TAAGCACGTGGTGATTGAGG                        |
| human DAAM1 promoter       | ChIP | FWD: ACAACTAGGTTCGGCAGGAA                        |
| human DAAM1 promoter       | ChIP | REV: GGACAGAGAACACACACCCT                        |
| human MAT2A promoter       | ChIP | FWD: TTGGGAATGCACCTTGTTCT                        |
| human MAT2A promoter       | ChIP | REV: ACAAGAACGCCGGGTTTAAT                        |
| $\Delta$ C-ERG3            | Mut. | CGCCTACAAGTTCGACTAACACGGGATCGCCCAGG              |
| P-I-ERG3                   | Mut. | CAGGCAGTGGCCAGATCTTAACTTTGGCAGTTCCTC<br>CTGG     |
| P-ERG3                     | Mut. | CCTCAGAGAGACTCCTCTTCCATAATTGACTTCAGAT<br>GATGTTG |
| N-ERG3                     | Mut. | GCTACATGGAGGAGAAGCACTAACCACCCCCAAACA<br>TGACC    |
| ERG-K362A                  | Mut. | CCGGCGCTGGGGAGAGCGGGCGAGCAAAC<br>CCAACATG        |
| EZH2- $\Delta$ CXC         | Mut. | CAGCTGTATCTTTCTCTAGTGTGCAGCCCAC<br>AACCGG        |
| EZH2-1-340                 | Mut. | GCTGCTGCTCTCACCGCTTAGCGGATAAAG<br>ACCCACC        |
| S21A-EZH2                  | Mut. | GTTGGCGGAAGCGTGTAAGAGCAGAGTACATGCCA<br>CTGAGACAG |
| S21D-EZH2                  | Mut. | GTTGGCGGAAGCGTGTAAGAGCAGAGTACATGCCA<br>CTGAGACAG |
